# Supplementary material
Source: PubMed Central journal article supplement (PMC4304419)
Supplement: supp_jlb.2A1013-568RRR_Supplemental_Figure1.pdf [file supp_jlb.2A1013-568RRR_Supplemental_Figure1.pdf]

Figure S1

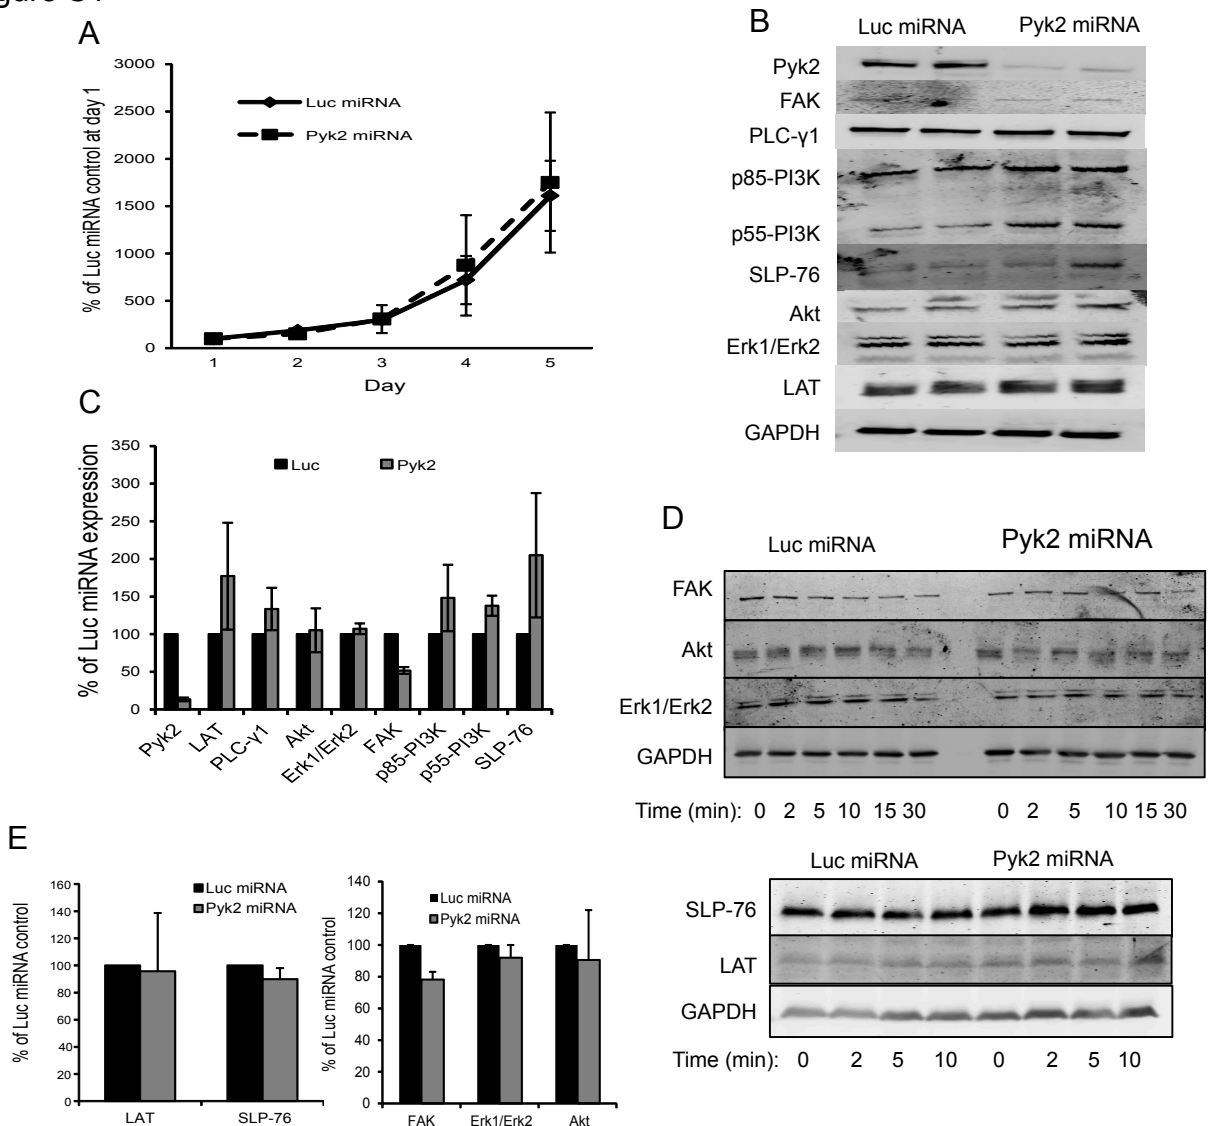

**FIGURE S1.** A) Proliferation of HuT78 T cells that stably express the luciferase-specific or Pyk2-specific microRNAs. Data are the mean  $\pm$  s.d. of two experiments. B) The expression of the indicated proteins were compared in the stable Pyk2-deficient HuT78 T cells and control cells. C) Quantification of protein expression in the stable Pyk2-deficient HuT78 T cells relative to the controls. Data are the mean of at least two independent experiments  $\pm$  s.e.m. D) The expression of indicated proteins in transiently transfected control and Pyk2-deficient HuT78 T cells were assessed by immunoblotting. E) Quantification of protein expression in the Pyk2-deficient HuT78 T cells relative to the control cells. Data are the mean of three independent experiments  $\pm$  s.e.m.
