# Supplementary material
Source: PubMed Central journal article supplement (PMC4304419)
Supplement: supp_jlb.2A1013-568RRR_Supplemental_Figure2.pdf [file supp_jlb.2A1013-568RRR_Supplemental_Figure2.pdf]

Figure S2

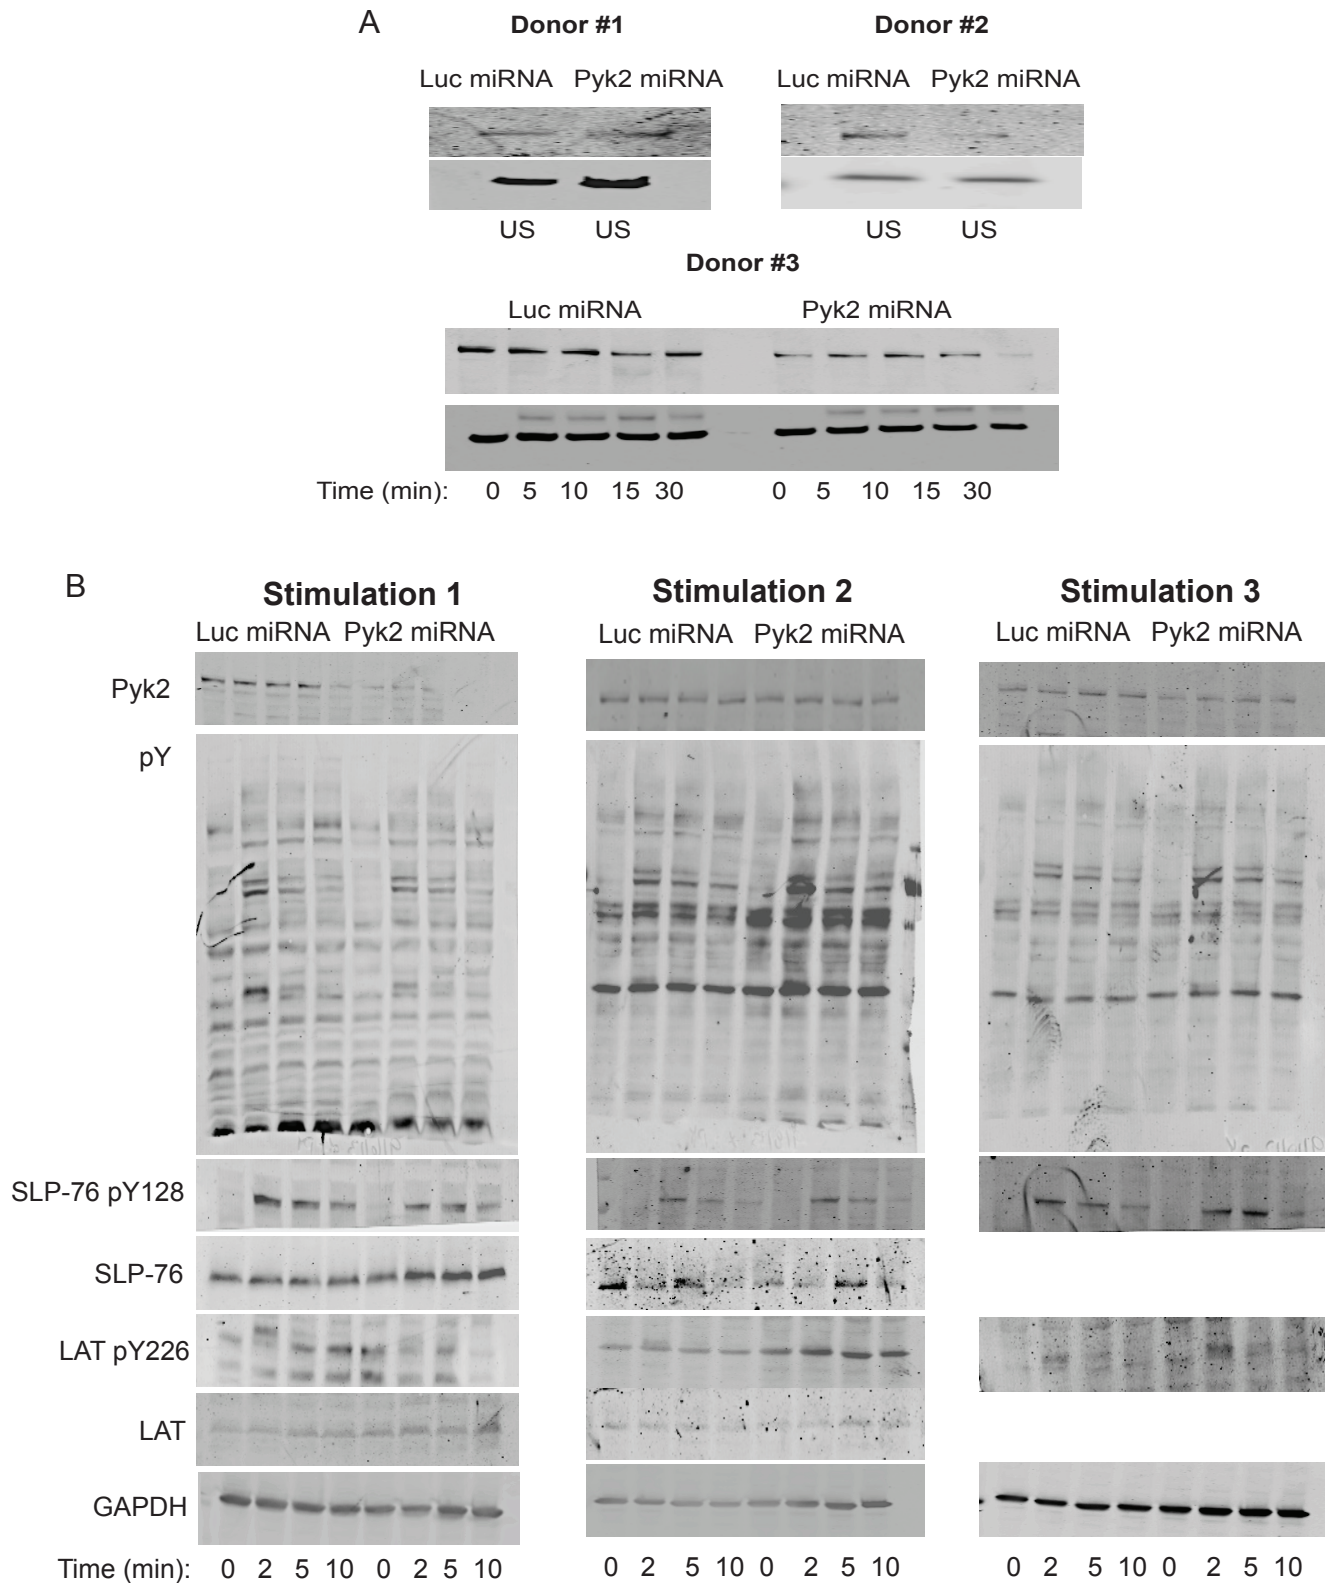

**Figure S2.** A) Experimental replicates of total Pyk2 expression in APBTs. These immunoblots were quantified to generate the graphs shown in Figure 2A. Donors #1 and #2 were unstimulated (US) samples, while donor #3 samples were stimulated with anti-CD3 Ab for various times prior to immunoblotting. For donor #3, the average expression of Pyk2 across all time points was used to normalize the data similar to Figure S2. B) Experimental immunoblot replicates of proximal signaling analysis in control and Pyk2-deficient HuT78 T cells. These immunoblots are the three experimental replicates used to generate the quantification shown in Figure 4C.
