# Supplementary material
Source: PubMed Central journal article supplement (PMC4304419)
Supplement: supp_jlb.2A1013-568RRR_Supplemental_Figure3.pdf [file supp_jlb.2A1013-568RRR_Supplemental_Figure3.pdf]

**Figure S3**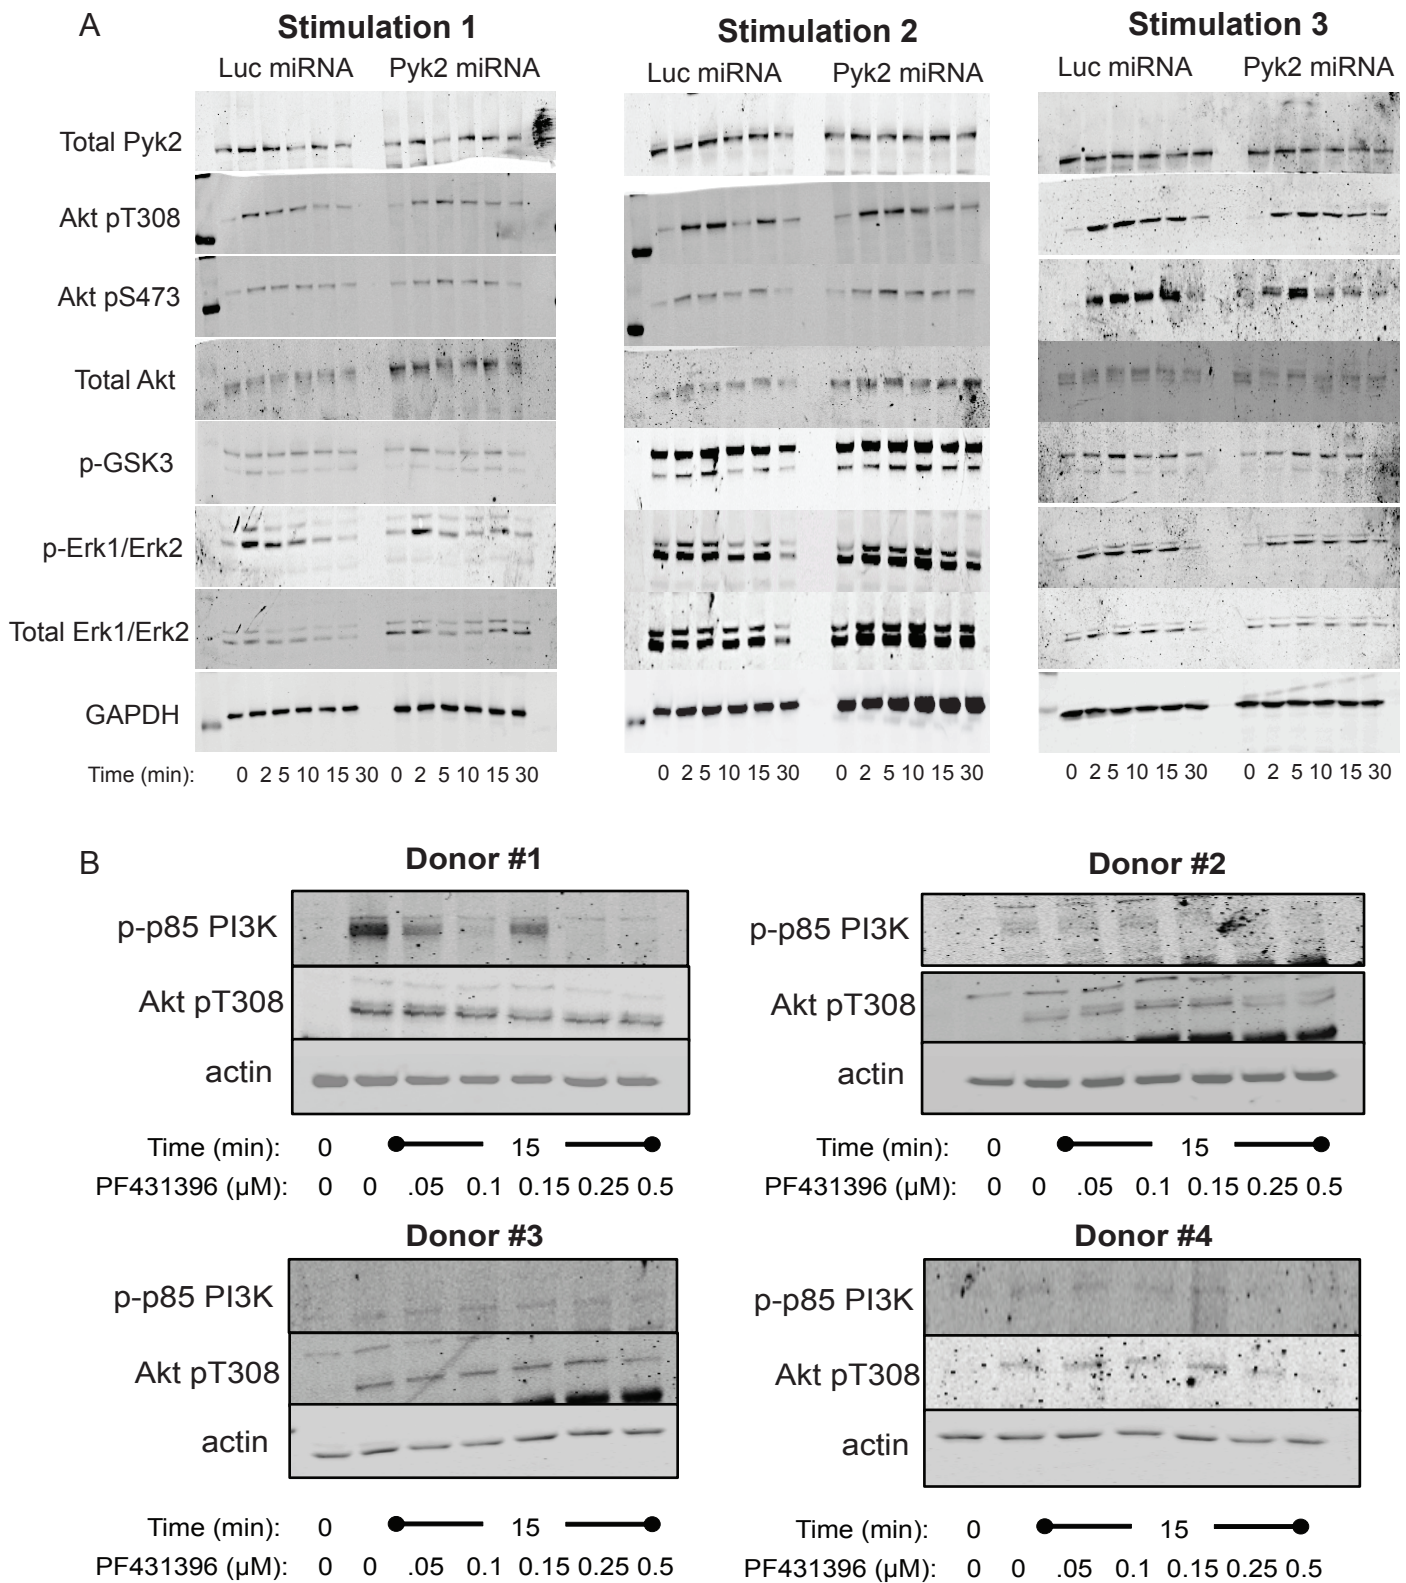

**Figure S3.** A) Experimental immunoblot replicates of PI3K-induced signaling in control and Pyk2-deficient HutT78 T cells. These immunoblots are the three different replicates used to calculate the quantification shown in Figure 6B-6C. B) Immunoblot replicates of p-p85 PI3K and Akt pT308 levels following PF431396 treatment in APBTs. These immunoblots were derived from the four separate donors treated with PF431396 and were used to quantify differences in p85 Y458 and Akt T308 phosphorylation as shown in Figure 7B.
