# Supplementary material
Source: PubMed Central journal article supplement (PMC4304419)
Supplement: supp_jlb.2A1013-568RRR_Supplemental_Figure4.pdf [file supp_jlb.2A1013-568RRR_Supplemental_Figure4.pdf]

Figure S4

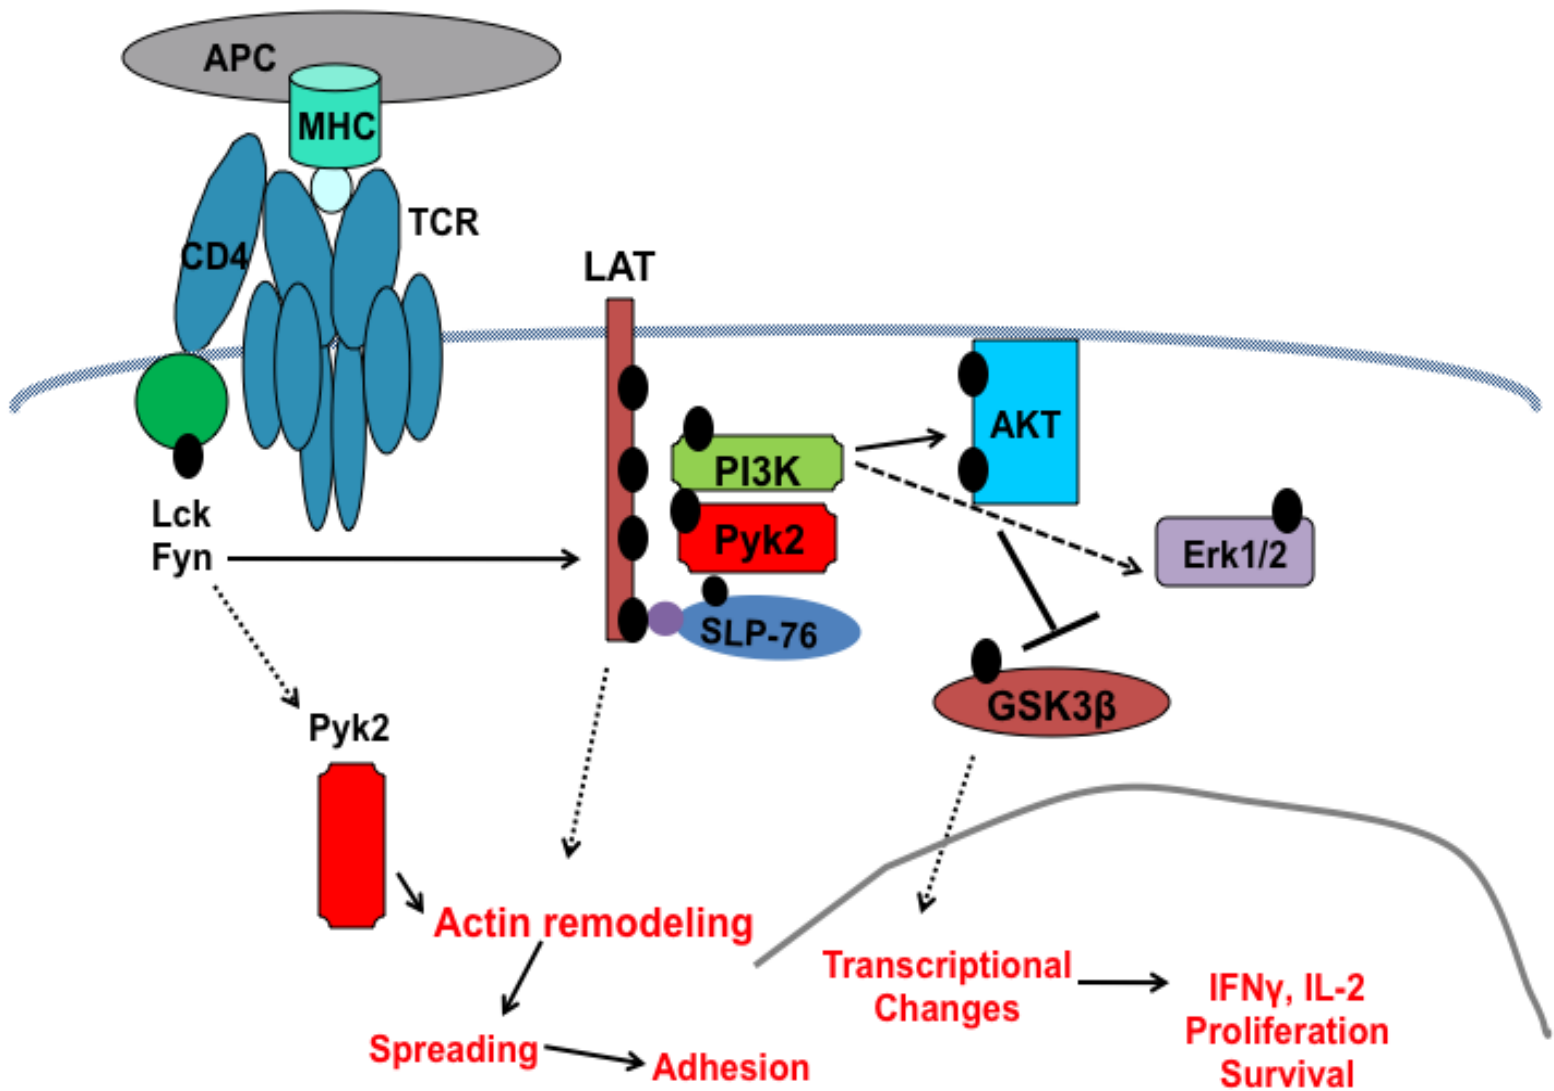

**Figure S4.** Proposed model of Pyk2 function downstream of the TCR. In human T cells, Pyk2 is rapidly phosphorylated Fyn/Lck upon TCR stimulation. Phosphorylated Pyk2 localizes to the plasma membrane via its interaction with LAT-containing multi-protein complexes, but also localizes to regions outside of LAT microclusters. LAT-associated Pyk2 regulates PI3K-driven effector functions, in part by phosphorylating the p85 PI3K. By contrast, Pyk2 not associated with LAT regulates TCR-driven adhesion events.
